# Supplementary material for: Biochemical Characterizations of the Putative Endolysin Ecd09610 Catalytic Domain from Clostridioides difficile
Source: MDPI journal article supplement (doi:10.3390/antibiotics11081131), 2022-08-20
Supplement: s1 [file s1]

## **Supplementary data**

### **Biochemical Characterizations of the Putative Endolysin Ecd09610 Catalytic Domain from *Clostridioides difficile***

Hiroshi Sekiya <sup>1</sup>, Hina Yamaji <sup>1</sup>, Ayumi Yoshida <sup>1</sup>, Risa Matsunami <sup>1</sup>, Shigehiro Kamitori <sup>2</sup> and Eiji Tamai <sup>1,2\*</sup>

**Figure S1. Multiple sequence alignment of the catalytic domains of Ecd09610.**

**Figure S2. Species specificity of Ecd09610CD1, Ecd09610CD3, and Ecd09610CD53 lytic activities.**

**Figure S3. Binding assay for Ecd09610CD1, Ecd09610CD3, and Ecd09610CD53 with various bacteria.**

**Figure S4. Genes around ecd09610 (CD09610) in the *C. difficile* 630 genome.**

**Figure S5. Binding ability of the purified N-terminal uncharacterized region of Ecd09610 to *C. difficile* 630 cells.**

**Figure S6. Effect of NaCl on the binding ability of purified proteins to *C. difficile* 630.**

**Figure S7. Effect of the two catalytic domains.**

**Table S1. Primers used in this study.**

**a**

|          |     | Accession no.  |                                                                                   |
|----------|-----|----------------|-----------------------------------------------------------------------------------|
| Ecd09610 | 371 | CAJ67802.1     | KVFKNKLSNTGNIFVKYSAYKYNPAALMAAISIHETGNGSSSSCK-----NK                              |
| CWH      | 371 | YP_009206142.1 | KLLKGKLSNTGNIFVKYSAYKYNPALMAAISMHESARGTSNTAN-----TK                               |
| AcpCD    | 69  | 5WQW           | LSNKGVLGTGGQAFVNAAKAFNDPIYILVAQCLHETGNGTSKLAKGVTITEIADESKPIYNGNGQLVGHYHMIKLSKPVTV |
| AtlE     | 104 | SIN26952.1     | LKGGKILNENRGKVFLEAQKYEUNVIYILVSHALVETGNGKSELAKGIKDGG-----KRY                      |
| AtlA-gl  | 91  | 6FXP           | LVDRPTLLKHTDDFLKAAKDKHYNEVYLISSHALLETGAVKSELANGEVIDG-----KKY                      |
| StFlgJ   | 1   | 5DN4           | MDSKDFLARLSLPARLASQSGVPHHLILAQAALSGWGQRQTLRENG-----EPS                            |
| LytB     | 530 | AAK75086.1     | NINNSLLENKGATFKEAEAPHYHNALYLILAHSALESNWGRSKLAK-----DK                             |

|          |     |                |                                                                                |
|----------|-----|----------------|--------------------------------------------------------------------------------|
| Ecd09610 | 419 | CAJ67802.1     | NNFEGMKG-----MSFGSVDEGKRGISNLSRNYIHTGRKTLESIRD-KYAPL--                         |
| CWH      | 419 | YP_009206142.1 | NNFEGMKKNGDY-----MSFGSVDEGKRGISNLSRNYIHIGRKTLESIRN-KYS----                     |
| AcpCD    | 150 | 5WQW           | YNLFEGGAKDNSSVFPNRAILIGTTTAYN-----RGMTSIEAATKGAEEFVSLNYHSSRYSQNTLYKMRYNQNV     |
| AtlE     | 159 | SIN26952.1     | YNFEGGGAFDSSA-----VRSGKSYAEK-----EQWTSFPAKATIGGAKFIRNEYFEN---NQLNLYQMRWNPENP   |
| AtlA-gl  | 146 | 6FXP           | YNFEGGALDKDP-----IKTGAEYAKK-----HGMDFPEKATSGGADFHKHFLSS--TDQNTLYSMRWNPKNP      |
| StFlgJ   | 53  | 5DN4           | YNFEGGKATASWKGVPVT--EITTEYENGEAKVKAKFRVYSSYLEALSDYVALLTRN---PRYAAVTTAATAEQGAVA |
| LytB     | 578 | AAK75086.1     | NNFEGGATAYDTP-----YLSA-----KTEDDVKGILGATKWIKENYIDRGRTF-----LGNKAS              |

|          |     | Accession no.  |                                      |
|----------|-----|----------------|--------------------------------------|
| Ecd09610 | 466 | CAJ67802.1     | ---YDSPLNKDVPGV---GKFYKQITGNAYSSNS   |
| CWH_g    | 468 | YP_009206142.1 | -----SSSDKEVVKCV---GAFYKQITGSTYNSNS  |
| AcpCD    | 221 | 5WQW           | NIWHQYATTPWASSIADIMRS-YQDIYLEN----   |
| AtlE     | 221 | SIN26952.1     | A-QHQYASDIRADKIAKLMKSYKOGGIKK-----   |
| AtlA-gl  | 209 | 6FXP           | G-EHQYATDIKAESNATIIADFYKNKTEG-----   |
| StFlgJ   | 127 | 5DN4           | LQAGYATDPNARKLTSMIQQLK-AMSEKVSK---   |
| LytB     | 629 | AAK75086.1     | GMNVEYASDPYVGEKIASVMMKINEKIGGKD----- |

**b**

|          |     | Accession no.  |                                                                                |
|----------|-----|----------------|--------------------------------------------------------------------------------|
| Ecd09610 | 529 | CAJ67802.1     | KVSKVIQEAKNQL-GKPYAWGGN-----GPKSFDGSGLMVWAFKRGAGINLKRVSADQSKDSRGKLLCNIND       |
| CWH      | 529 | YP_009206142.1 | KVSKVIQEAKNQL-GKPYKWGGN-----GPKSFDGSGLMVWAFKRGAGINLKRVSADQSKDSRGKLLCNIND       |
| Acd24020 | 271 | CAJ69287.1     | GADSVISFAKTL-LGKPYVWGAE-----GPNFSDGSGFTQYVMKKSVMGVSIPRTAQAYDAT---QHLPLSQ       |
| CD03720  | 213 | CAJ67194.1     | LAQKVMNEALKYQGWKYVYGGSN-----PNTSFDGSGLTQWCY-GKAGSLPVSRLDQSKYG---TYVNRGD        |
| NpPCP    | 97  | ZP_00105875.2  | LAEVIAFTQKAMQSSNYLWGGT-----VGPNYDGSGLMQAAF-ASVGWLPRDAYQOEGFT---QPITIAE         |
| RipA     | 342 | 4Q4G           | ASEYVIRRGMSQI-GVPYSWGGGNAAGPSKIDSGAGTVGFDASGLVLYSF-AGVGKLPVYSGSQYNLG---RKIPSSQ |
| P60_tth  | 127 | BAD70089.1     | PESPLRAVLRYL-GVPYKYGAN-----SPLALDCSAFVAQVY-AELGVALPRTTKEQYQ-----AFPPVEA        |
| BcYkfc   | 188 | 3H41           | AADDINTGKMFL-GLPYIWAGT-----SGFGFDGSGTHTTIY-KSHGTTIPRDSGFSRNG---VAVDKEH         |

|          |     | Accession no.  |                                                                            |
|----------|-----|----------------|----------------------------------------------------------------------------|
| Ecd09610 | 596 | CAJ67802.1     | VKAGDLVFFAYN-KGKGNVHHVGLYIGNDQYIHAPQTGD---VKISSLSG---R--QKKKHDFARARRFF---- |
| CWH      | 596 | YP_009206142.1 | VKAGDLVFFAYN-KGKGNVHHVGLYIGNDQYIHAPQTGD---VKISSLSG---R--QKKKHDFARARRFF---- |
| Acd24020 | 337 | CAJ69287.1     | LRSGDLVFFDTQGSNNGSVSHVGYTGNGDMIHASSGSSK-DPIGYAD-----LSSSYWQOHLIGAGRVKQ---  |
| CD03720  | 276 | CAJ67194.1     | AKAGDLVFFHSTYNAGSYVTHVGYVGNQMYHAG-----KVTISNINS-----SYSSRYVNARRVL----      |
| NpPCP    | 161 | ZP_00105875.2  | LVAGDLVFFGTSQK---ATHVGLYLDAGYYIHSSGKDQGRDGLGIDILSEQGDVSLSYQQLRGAGRNVFKS--  |
| RipA     | 418 | 4Q4G           | MRRGDLVFFGPNQ---SCHVTIYLGNGQMLEAPDVGLK---VRVAPVRT---AGMTPYRVRYIEY-----     |
| P60_tth  | 188 | BAD70089.1     | PRFGDLVFFSFGG---KEVDHVGGLYLRGVFAHASSYGSR---VVIESLEA-----PFYRKVYRGARRVMASPE |
| BcYkfc   | 251 | 3H41           | LQKGDILFQAHD-QGKGSVHHVAMYIGDGNMHSAPRAE-R--SWEIIPLNT-----PGYIEEYAGARRYLP--- |

**Figure S1. Multiple sequence alignment of the catalytic domains of Ecd09610.**

(a) N-acetylglucosaminidase (PF01832: GH73 family) and (b) endopeptidase (PF00877: NlpC/P60 family) are shown. The multiple sequence alignment was created using Clustal Omega (<https://www.ebi.ac.uk/Tools/msa/clustalo/>). Accession no. indicates the NCBI GenBank accession number. Conserved and identical residues (more than half) are shaded in gray and black, respectively.

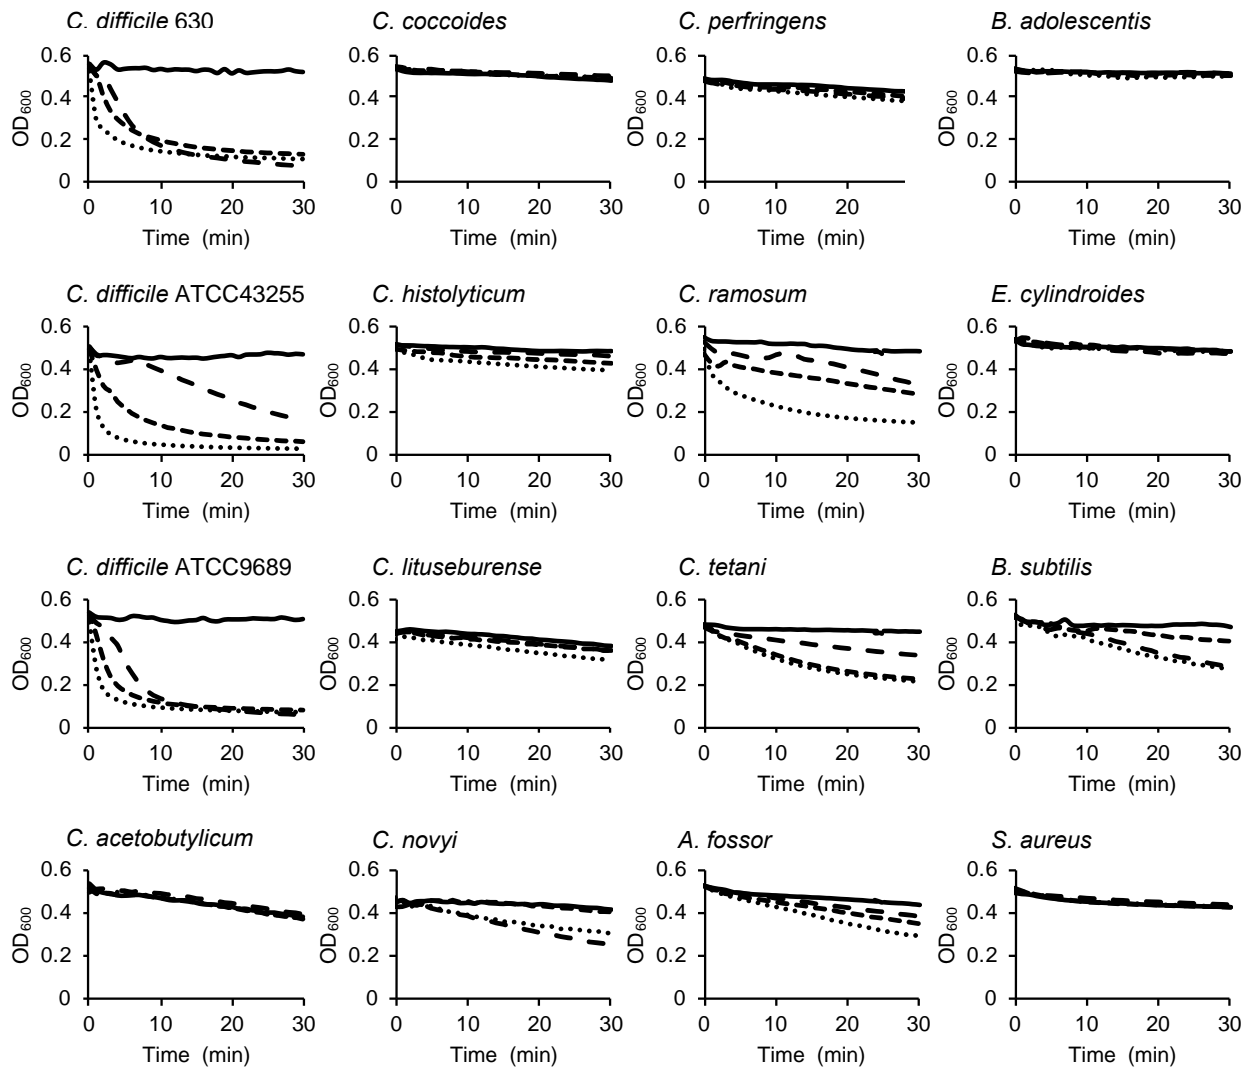

**Figure S2. Species specificity of Ecd09610CD1, Ecd09610CD3, and Ecd09610CD53 lytic activities.**

Experiments were repeated three times with similar results. Ecd09610CD1 (0.14  $\mu$ M, dotted line), Ecd09610CD3 (0.2  $\mu$ M, dashed line), or Ecd09610CD53 (0.3  $\mu$ M, long dashed line) or buffer (solid line) was added to the cells, and OD<sub>600</sub> was measured at 1-min intervals for 30 min.

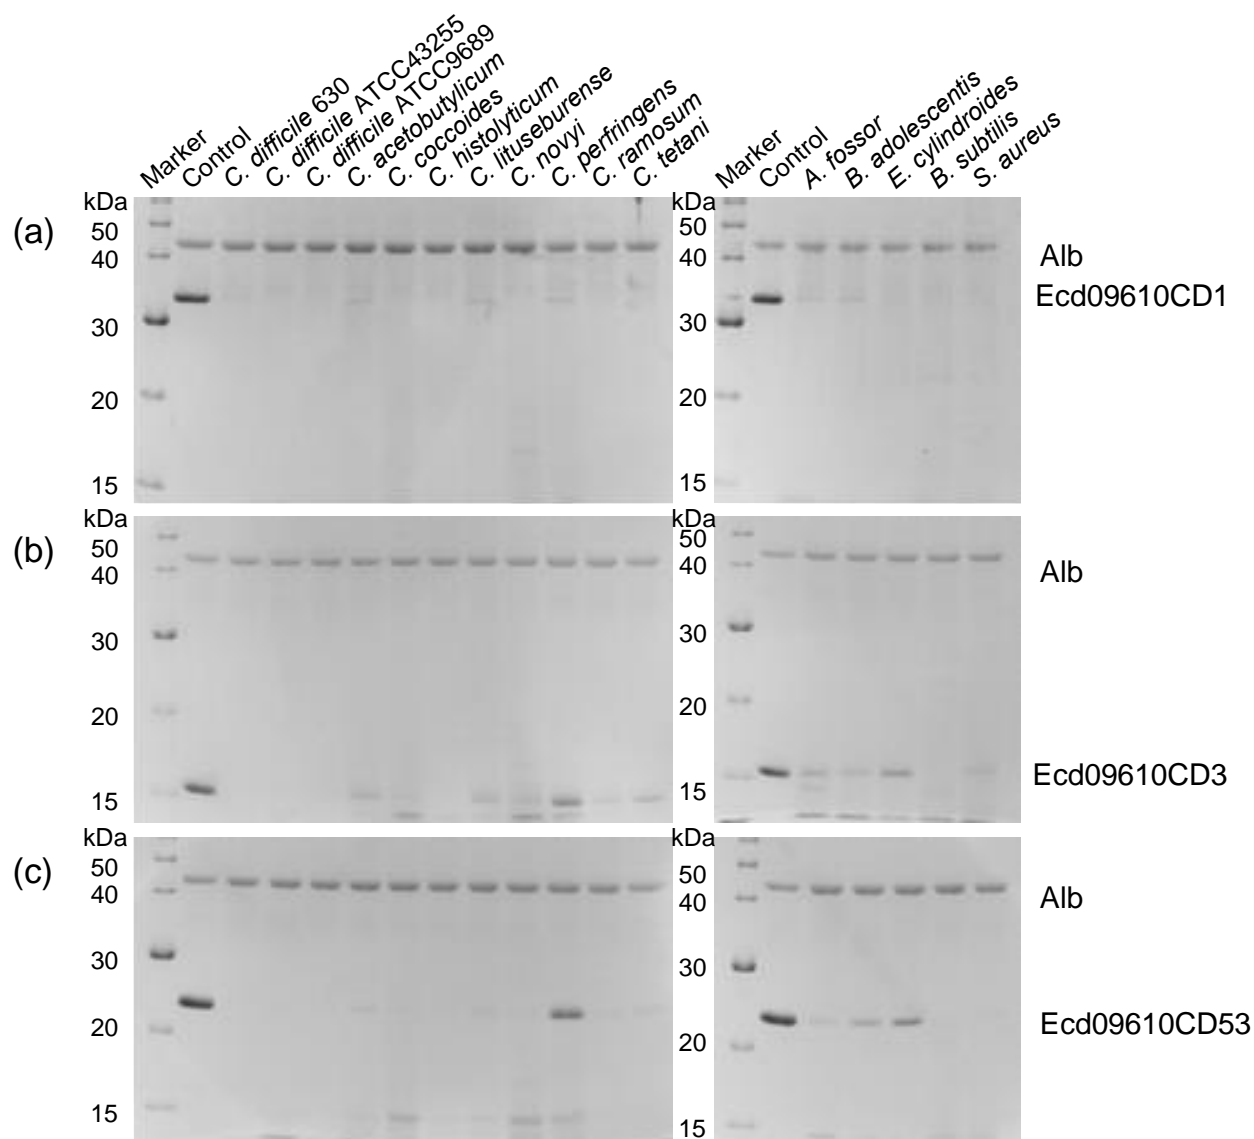

**Figure S3. Binding assay for Ecd09610CD1, Ecd09610CD3, and Ecd09610CD53 with various bacteria.** Experiments were repeated three times with similar results. One microgram of purified Ecd09610CD1 (a), Ecd09610CD3 (b), Ecd09610CD53 (c), or ovalbumin (Alb) as a nonbinding internal standard were incubated on ice with or without heat-inactivated cells as indicated at the top of the gel. After centrifugation, the supernatants were analyzed by 13.5% SDS-PAGE.

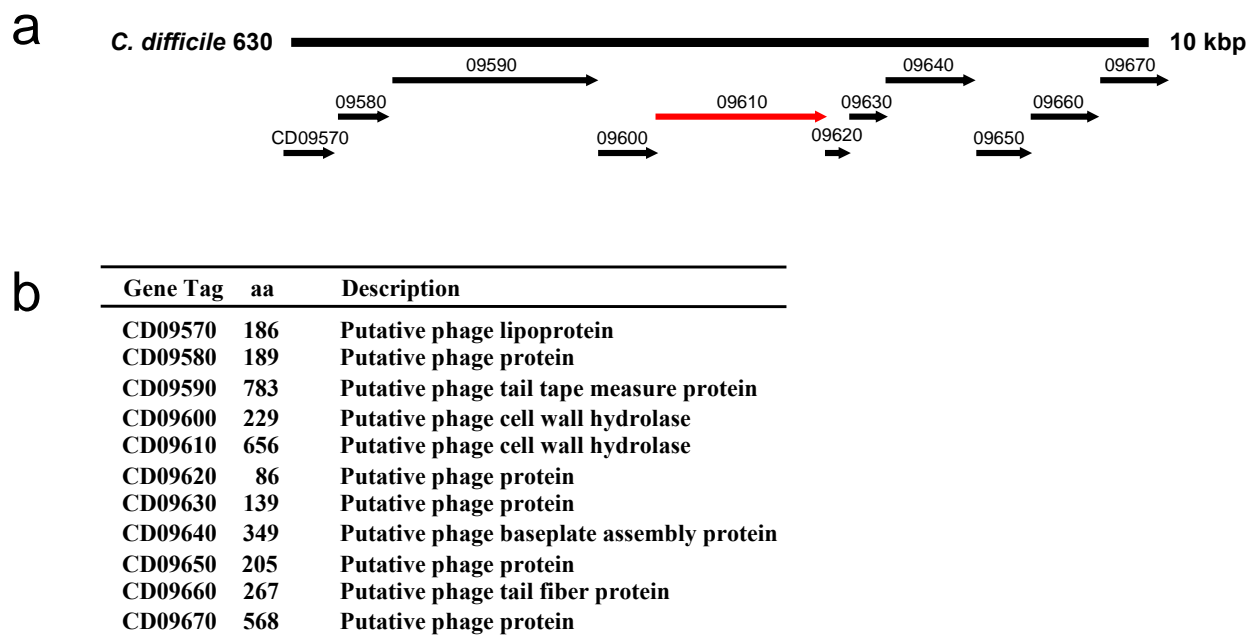

**Figure S4. Genes around ecd09610 (CD09610) in the *C. difficile* 630 genome.**

(a) *C. difficile* 630 has a group of phage-related genes of about 60 kbp that constitute a phage remnant region.

(b) Genes in the genome region from CD09570 to CD09670 in *C. difficile* 630 are shown.

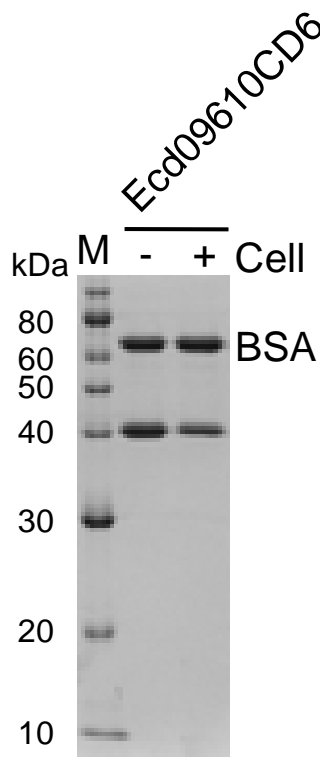

**Figure S5. Binding ability of the purified N-terminal uncharacterized region of Ecd09610 to *C. difficile* 630 cells.**

One microgram of purified Ecd09610CD6, which has only the N-terminal uncharacterized region of Ecd09610, and nonbinding internal standard (bovine serum albumin: BSA) were incubated with or without heat-inactivated cells on ice. After centrifuging the samples, the supernatants were analyzed by 13.5% SDS-PAGE.

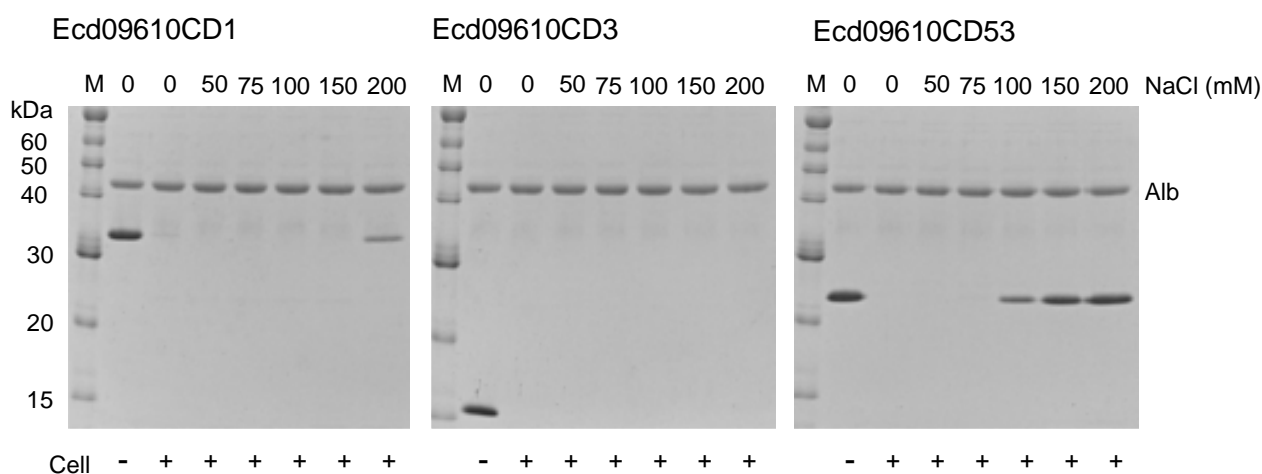

**Figure S6. Effect of NaCl on the binding ability of purified proteins to *C. difficile* 630.**

The binding abilities of Ecd09610CD1, Ecd09610CD3, and Ecd09610CD53 to *C. difficile* 630 are shown. One microgram of purified Ecd09610CD1, Ecd09610CD3, Ecd09610CD53, and nonbinding internal standard (ovalbumin: Alb) were incubated with or without heat-inactivated cells on ice. After centrifuging the samples, the supernatants were analyzed by 13.5% SDS-PAGE.

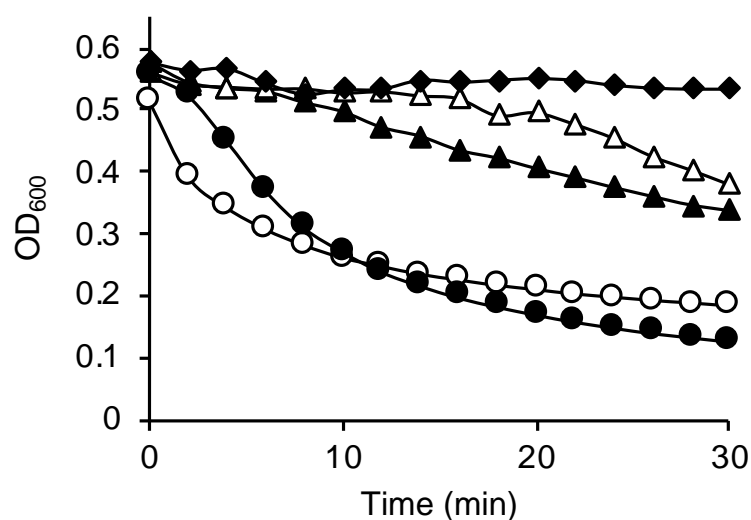

**Figure S7. Effect of the two catalytic domains.**

The lytic activities of proteins (0.08 μM) were determined by the turbidity reduction assay against *C. difficile* 630 cells. Both Ecd09610CD3 and Ecd09610CD53 together (filled circles), Ecd09610CD1 (open circles), Ecd09610CD3 (filled triangles), Ecd09610CD53 (open triangles), and control (filled diamonds) are shown.

Table S1 Primers used in this study.

| Primer name   | Primer sequence (5' - 3')           |
|---------------|-------------------------------------|
| CD09610-N     | CGCcatatgGTTGATGAATTAGTGTTAG        |
| CD09610-m1    | CCCCAAGCATACGGCTTACCAAG             |
| CD09610-m2    | CTTGGTAAGCCGTATGCTTGGGG             |
| CD09610-C     | CGCggatccTTAAAAGAATCTTCTAGCTCTTG    |
| CD09610-CD1   | CCCcatatgACCACAAGTAAAGAAGACAATG     |
| CD09610-CD3   | CCCcatatgAAAGTAAGTAAAGTTATTCAAGAAGC |
| CD09610-CD5 R | CCCggatccTTAATACGGCTTACCAAGTTG      |
| pCold F       | ACGCCATATCGCCGAAAGG                 |
| pCold R       | TGGCAGGGATCTTAGATTCTG               |
